# Supplementary material for: Structure–property relations in hexagonal and monoclinic BiPO4:Eu3+nanoparticles synthesized by polyol-mediated method
Source: Royal Society of Chemistry journal article supplement (doi:10.1039/c1ra00389e), 2011-12-21
Supplement: c1ra00389e.pdf [file c1ra00389e.pdf]

## Electronic Supplementary Information (ESI)

### Structure-Property Relations in Hexagonal and Monoclinic $\text{BiPO}_4\text{:Eu}^{3+}$

#### Nanoparticles Synthesized by Polyol-mediated Method

*P. Arunkumar, C. Jayajothi, D. Jeyakumar, N. Lakshminarasimhan\**

Functional Materials Division,  
CSIR-Central Electrochemical Research Institute (CECRI),  
Karaikudi 630 006, Tamil Nadu, India.

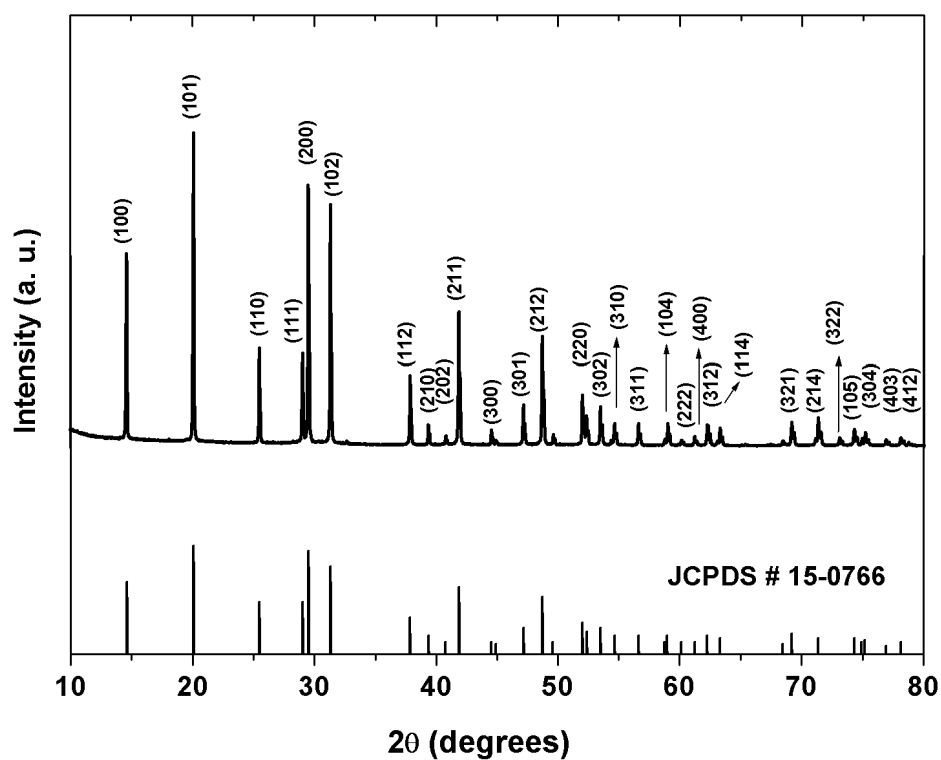

Figure S1. Powder XRD pattern of hexagonal  $\text{BiPO}_4\cdot x\text{H}_2\text{O}$  obtained by precipitation method.

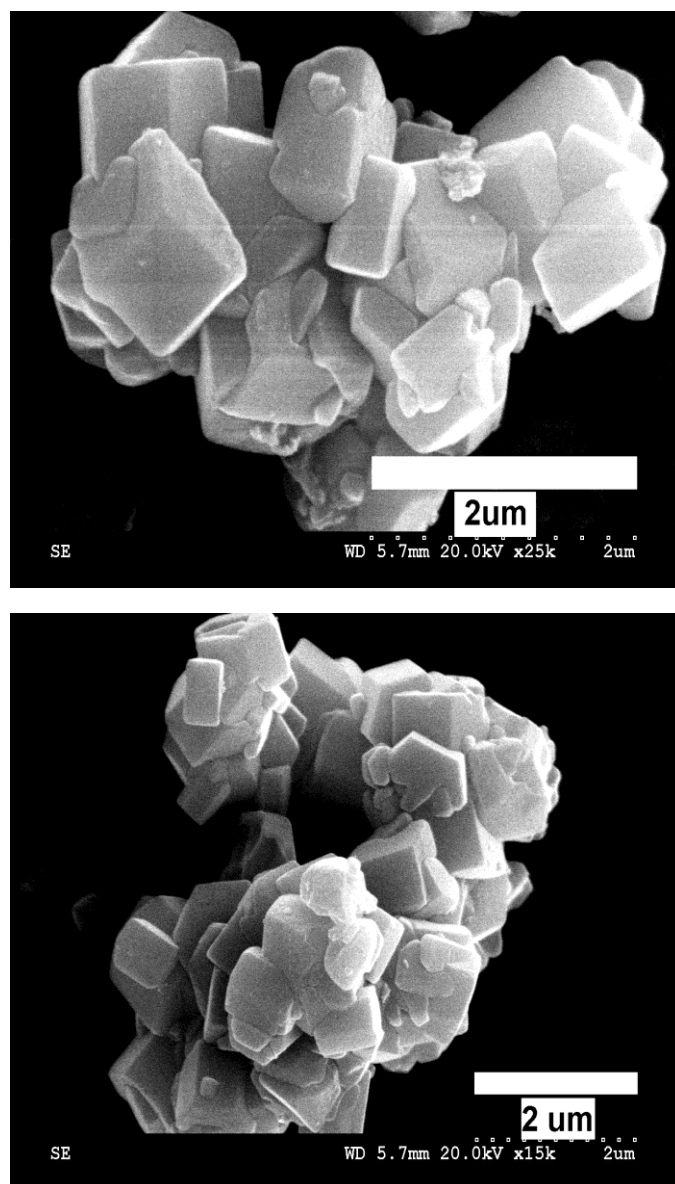

Figure S2. SEM images of hexagonal  $\text{BiPO}_4 \cdot x\text{H}_2\text{O}$  obtained by precipitation method.

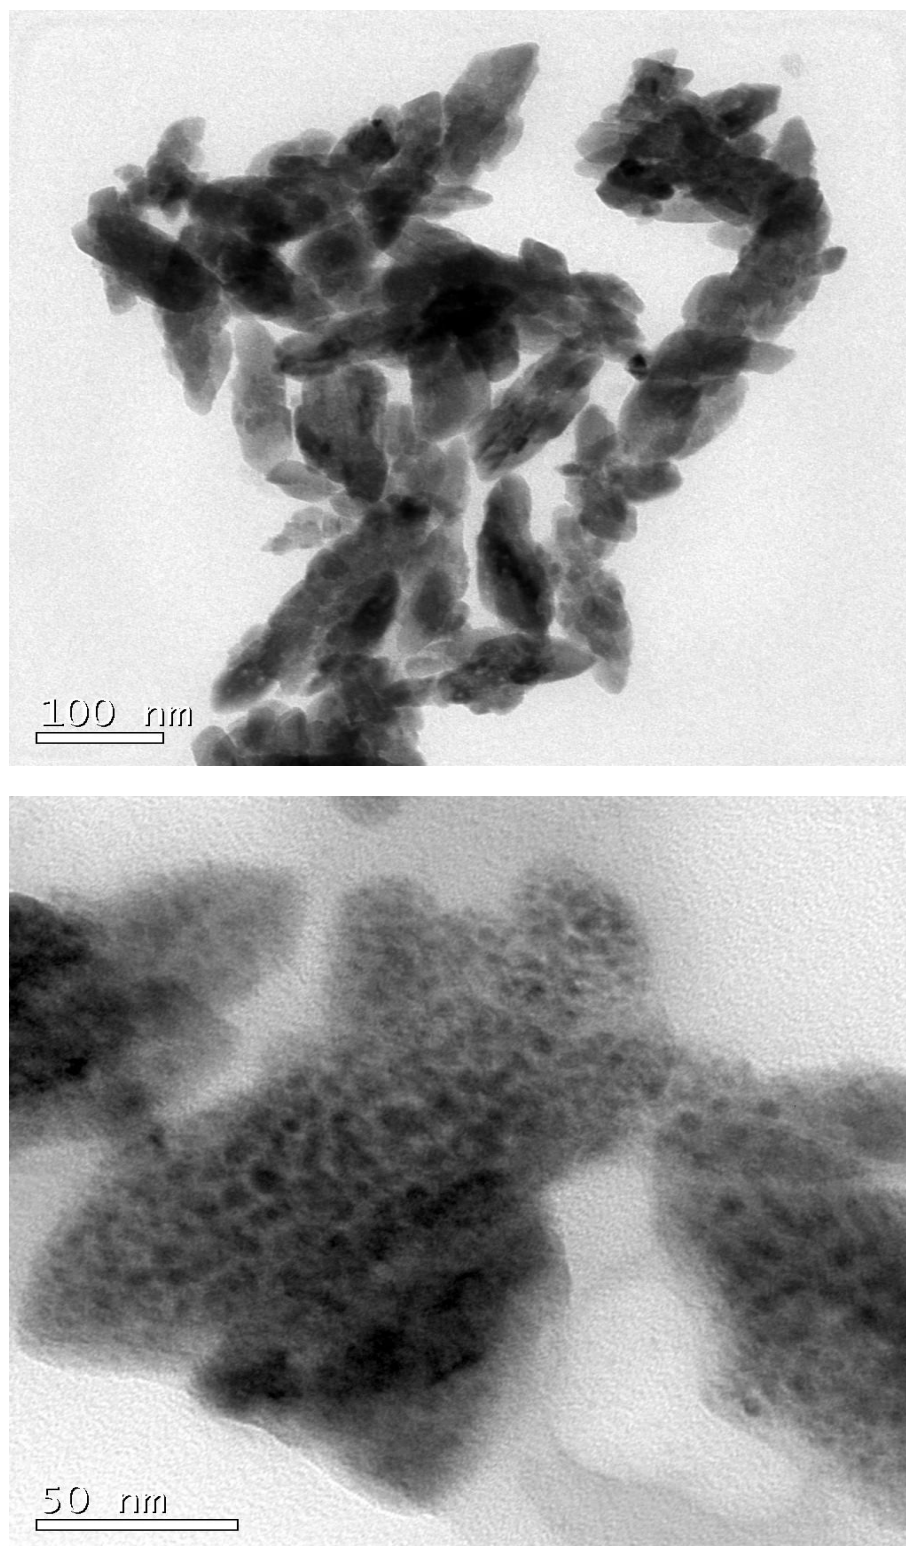

Figure S3. TEM images of hexagonal  $\text{Bi}_{0.95}\text{Eu}_{0.05}\text{PO}_4 \cdot x\text{H}_2\text{O}$ .

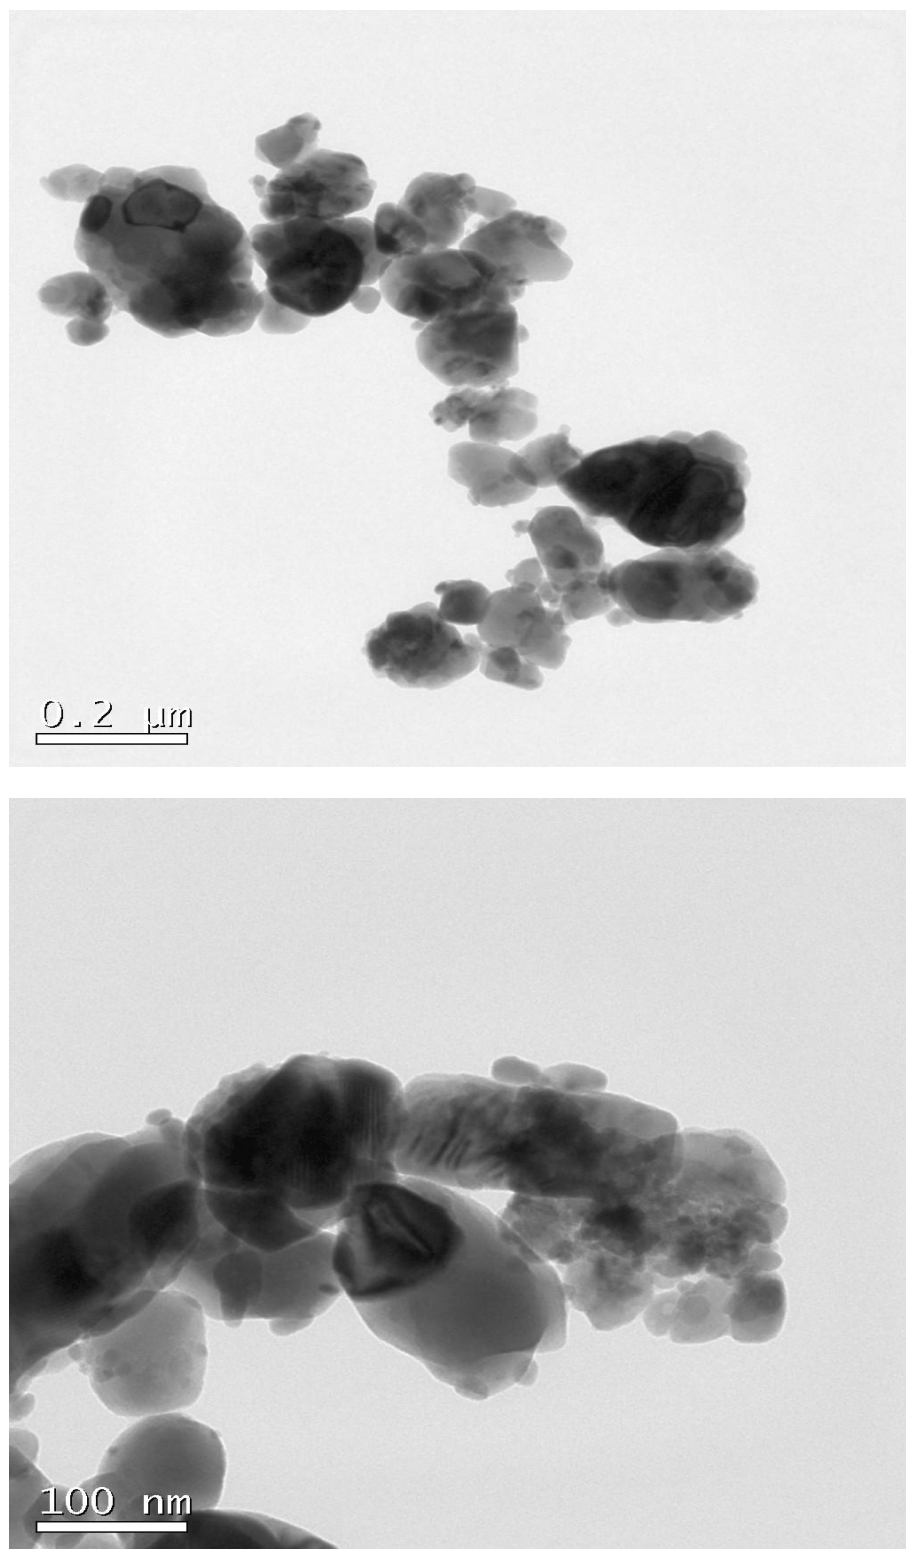

Figure S4. TEM images of monoclinic  $\text{Bi}_{0.95}\text{Eu}_{0.05}\text{PO}_4$

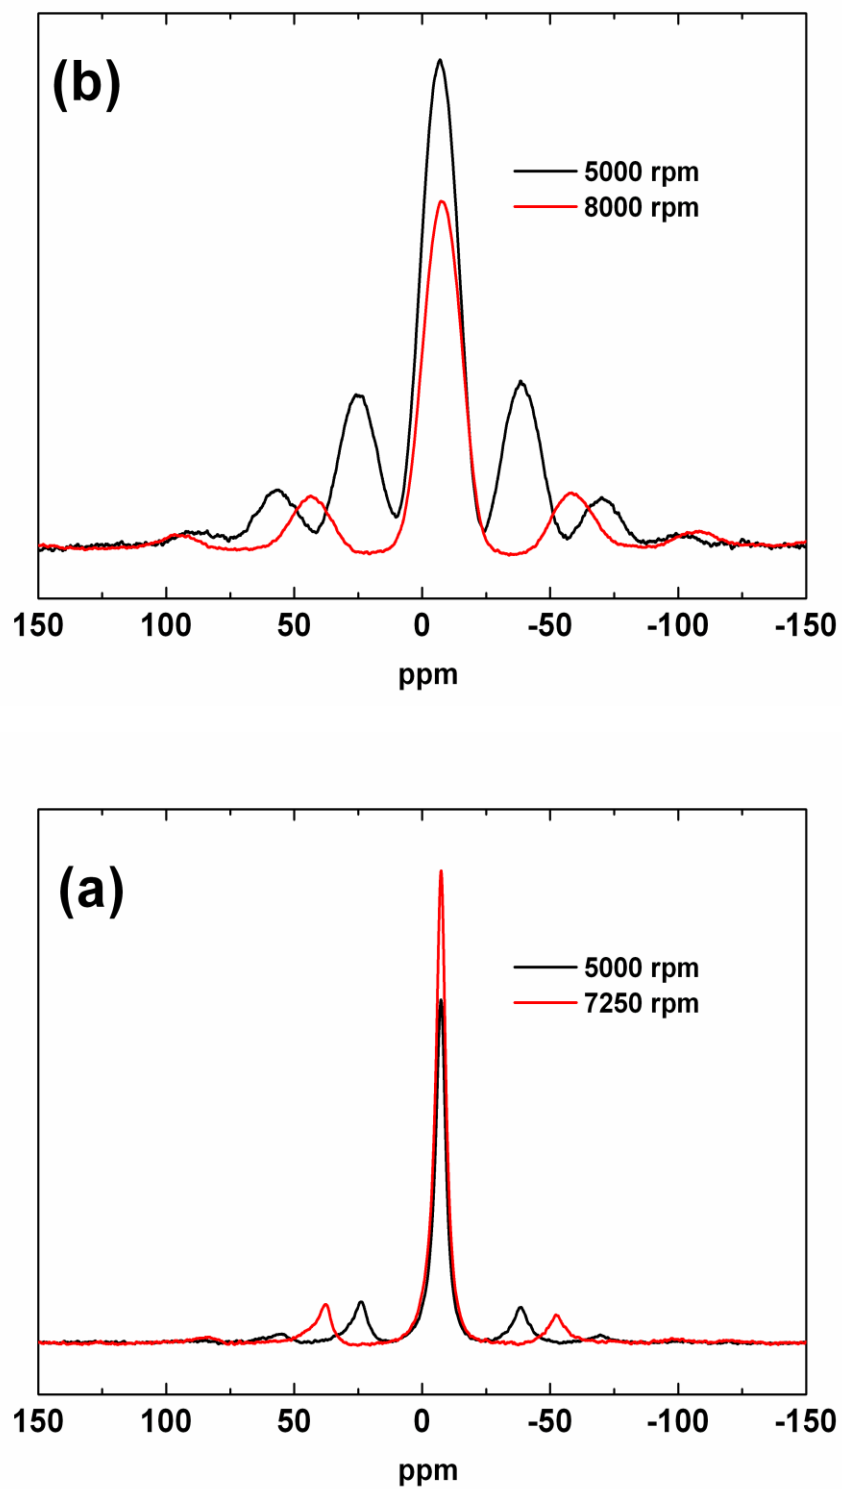

Figure. S5. The shift in the position of spinning side bands in the  $^{31}\text{P}$  MAS-NMR spectra of (a) hexagonal  $\text{Bi}_{0.95}\text{Eu}_{0.05}\text{PO}_4 \cdot x\text{H}_2\text{O}$  and (b) monoclinic  $\text{Bi}_{0.95}\text{Eu}_{0.05}\text{PO}_4$  under different spinning rates.

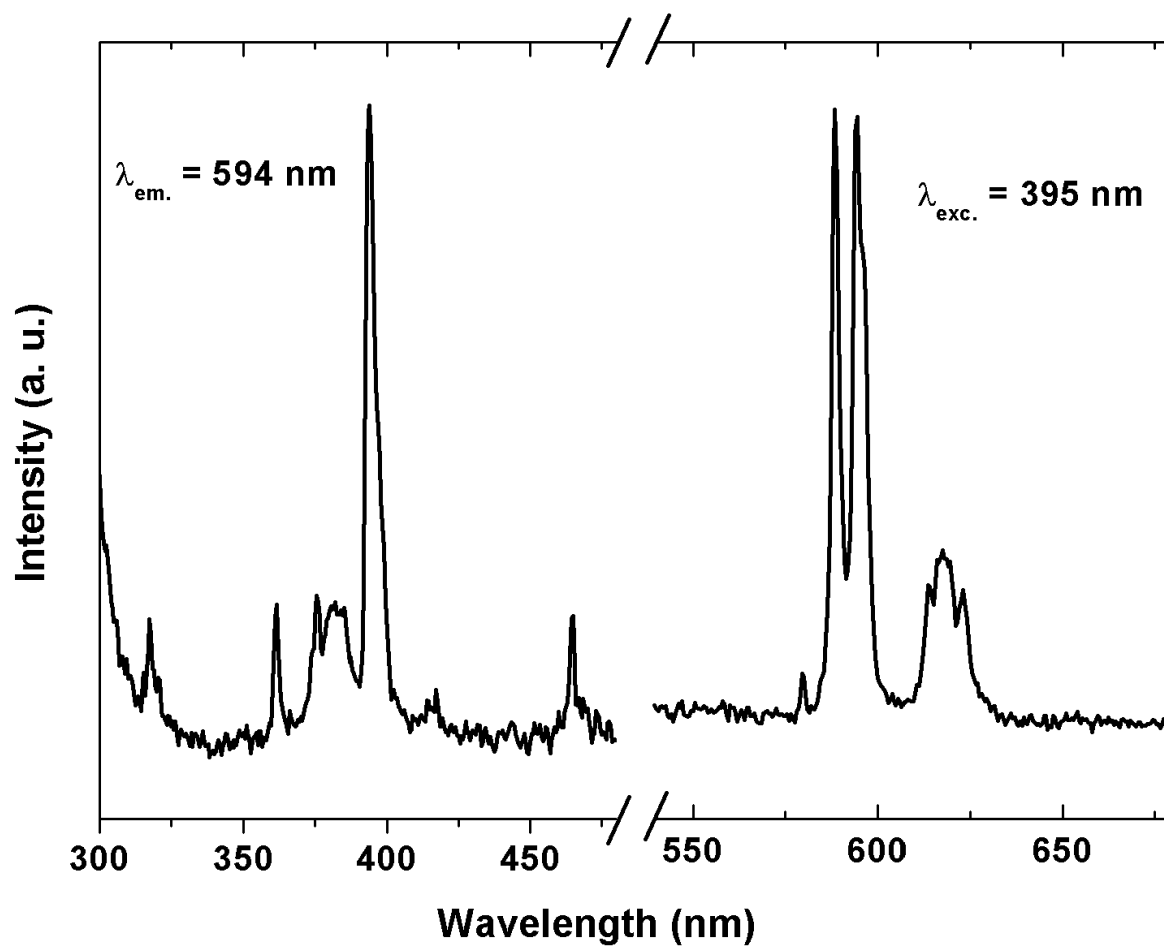

Figure S6. PL excitation and emission spectra of monoclinic  $\text{Bi}_{0.95}\text{Eu}_{0.05}\text{PO}_4$  obtained by conventional solid state reaction method.
